# Supplementary material for: Effects of the aspect ratio of plasmonic gold nanorods on the inhibition of lysozyme amyloid formation
Source: Royal Society of Chemistry journal article supplement (doi:10.1039/d3bm00400g), 2023-01-01
Supplement: d3bm00400g1.pdf [file d3bm00400g1.pdf]

# Supporting Information

## Effects of Aspect Ratio of Plasmonic Gold Nanorods on the Inhibition of Lysozyme Amyloid Formation

Khushboo Rani<sup>#1</sup>, Bhumika Pippal<sup>#1</sup>, Shubham Kumar Singh<sup>1</sup>, Anurupa Karmakar<sup>1</sup>, Raviraj Vankayala<sup>1,2</sup> and Neha Jain<sup>\*1,3</sup>

---

<sup>\*1</sup>Department of Bioscience and Bioengineering, Indian Institute of Technology Jodhpur, Karwar 342030. Email: [njain@iitj.ac.in](mailto:njain@iitj.ac.in)

<sup>2</sup>Interdisciplinary Research Platform Smart Healthcare, Indian Institute of Technology Jodhpur, Karwar 342030.

<sup>3</sup>Centre for Emerging Technologies for Sustainable Development (CETSD), Indian Institute of Technology Jodhpur, Karwar 342030.

# Equally contributed

## Determination of gold nanorod concentrations:

The detailed calculations on the concentrations of GNRs is provided below and also in the supporting information of the revised manuscript. The concentration of gold nanorods has been calculated by following the literature reported procedure for the spherical gold nanoparticles<sup>1</sup>. We have adopted the same procedure to determine the concentration of rod shaped gold nanoparticles (GNRs) by assuming them as cylinders. For example, detailed calculations were provided for a representative GNR of AR 2.2.

**Step-1:** To determine the average number of gold atoms per nanorod.

Assuming a cylindrical shape and a uniform face-centered cubic structure<sup>2</sup>, the average number of gold atoms ( $N$ ) per nanorod was calculated by Eq. (1), where  $\rho$  is the density for fcc gold ( $19.3 \text{ g/cm}^3$ )<sup>3</sup>,  $D$  is the diameter,  $l$  is the length of GNRs and  $M$  stands for atomic weight of gold ( $197 \text{ g/mol}$ ).

$$N = (\pi D^2 l \rho / 2) * M \dots\dots\dots(1)$$

$$= 3.14 \times 19.647 \times 19.647 \times 29.833 / 2 \times 197 = 1771.25$$

**Step-2:** To determine the molar concentrations of GNRs.

The molar concentration ( $C$ ) of the GNRs were calculated by dividing the total number of gold atoms ( $N_{\text{total}}$ , equivalent to the initial amount of gold salt added to the reaction solution) over the average number of gold atoms per nanorod ( $N$ ) according to Eq. (2), where  $V$  is the volume of the reaction solution in liter and  $N_A$  is the Avogadro's constant. We assume that the reduction of gold was 100%.

$$C = N_{\text{total}} / N_A V N \dots\dots\dots(2)$$

During the synthesis of GNRs, the concentration of gold used was 1 mM, in a reaction volume of 50 mL. The mass of gold used ( $W$ ) is 20 mg.

If 393.83 g of gold correspond to  $N_A$  of atoms, then 20 mg of gold should correspond to  $N_A \times 5 \times 10^{-4}$  atoms (Eq. (3))

$$N_{\text{total}} = N_A \times 5 \times 10^{-4} \dots\dots\dots(3)$$

Now substitute Eq. (3) in (2)

Then, the concentration of GNRs with AR 2.2 is 4.2 nM. In a similar manner, we have determined the concentrations of GNRs with AR 3.1 is 4.4 nM, and for AR 4.2 is 5.0 nM respectively.

| <b>Molecules used for amyloid inhibition</b> | <b>Size</b>   | <b>Target protein</b> | <b>Reference</b>                |
|----------------------------------------------|---------------|-----------------------|---------------------------------|
| Au NPs                                       | 30 nm         | A $\beta$             | 4                               |
| Au NPs & Au NRs                              | 30 nm & 83 nm | Lysozyme              | (Reference no. 25 in main text) |
| Au NRs                                       | 15-50 nm      | A $\beta$             | (Reference no. 44 in main text) |
| CMdex NPs                                    | 207 nm        | Lysozyme              | 5                               |
| Carbon dots                                  | < 6 nm        | Insulin               | 6                               |
| Histidine based polymer coated NPs           | 5-100 nm      | A $\beta$             | 7                               |

**Table S1:** Comparison of different modalities to inhibit amyloids (NPs represents nanoparticles).

| Entry | Mean length of the nanorod (L, nm) | Mean diameter of the nanorod (D, nm) | Aspect ratio (AR, L/D) | Transverse surface plasmon resonance (TSPR) | Longitudinal surface plasmon resonance (LSPR) |
|-------|------------------------------------|--------------------------------------|------------------------|---------------------------------------------|-----------------------------------------------|
| GNR1  | 46.9 ± 3.7 nm                      | 21 ± 2.3 nm                          | 2.2                    | 514 nm                                      | 643 nm                                        |
| GNR2  | 52.5 ± 1.56 nm                     | 16.9 ± 1.6 nm                        | 3.1                    | 512 nm                                      | 707 nm                                        |
| GNR3  | 51.2 ± 4.8 nm                      | 12.1 ± 1.3 nm                        | 4.2                    | 510 nm                                      | 802 nm                                        |

**Table S2:** Physico-chemical characteristics of GNRs.

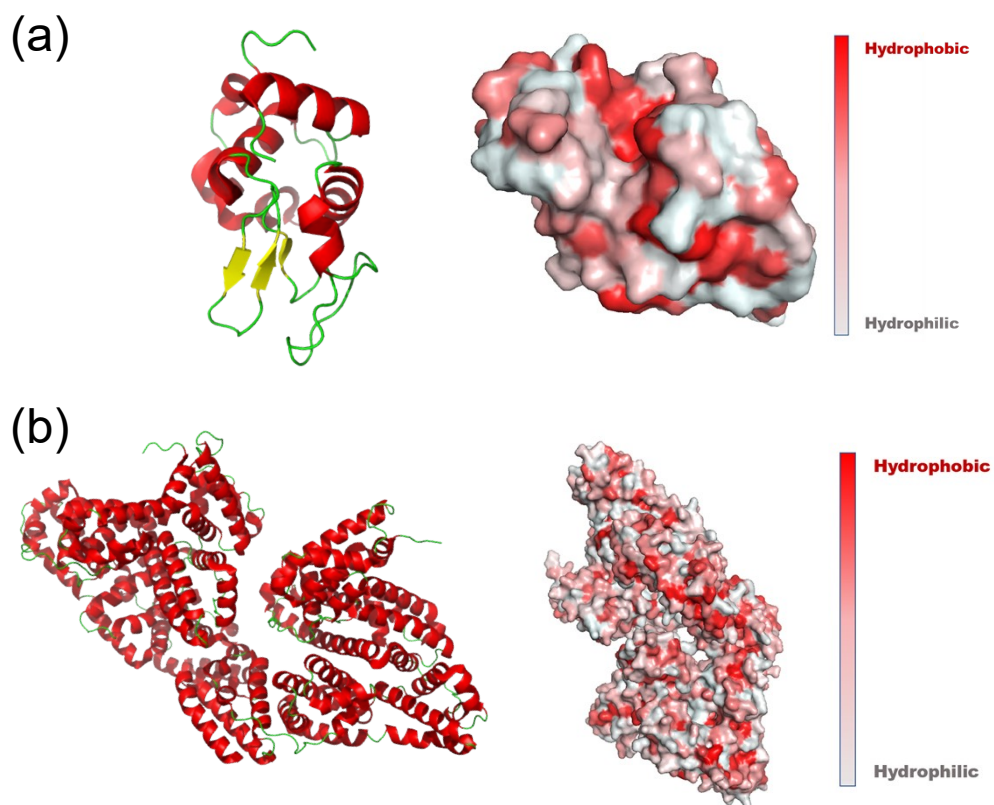

**Figure S1:** Representation of crystal structures comprising  $\alpha$ -helices (red),  $\beta$ -sheet (yellow) and random coil (green) and surface hydrophobicity. (a) Hen Egg White lysozyme (HEWL; PDB ID: 1GWD) and (b) Bovine Serum Albumin (BSA; PDB ID: 4F5S). The structures were drawn using PyMOL (Schrödinger Inc., LLC, New York).

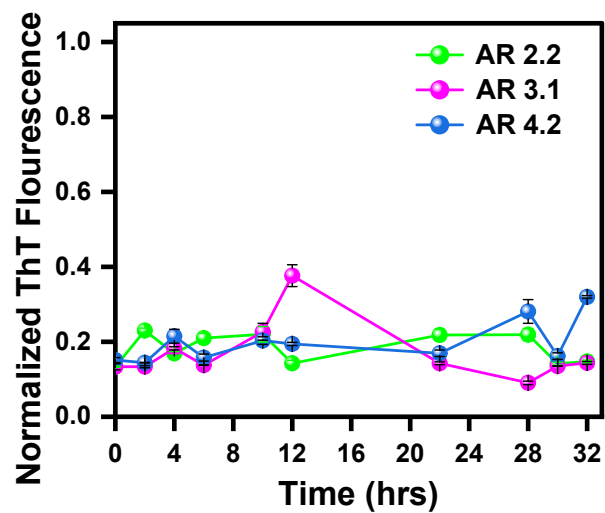

**Figure S2:** ThT fluorescence for GNRs recorded over time under the same aggregation conditions.

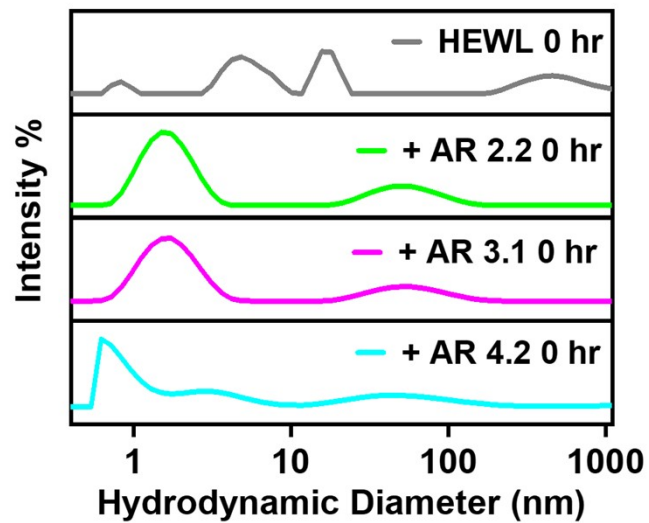

**Figure S3:** Dynamic light scattering data for HEWL alone and with all three AR GNRs (AR 2.2, AR 3.1 and AR 4.2) at the 0 hour (initial stage).

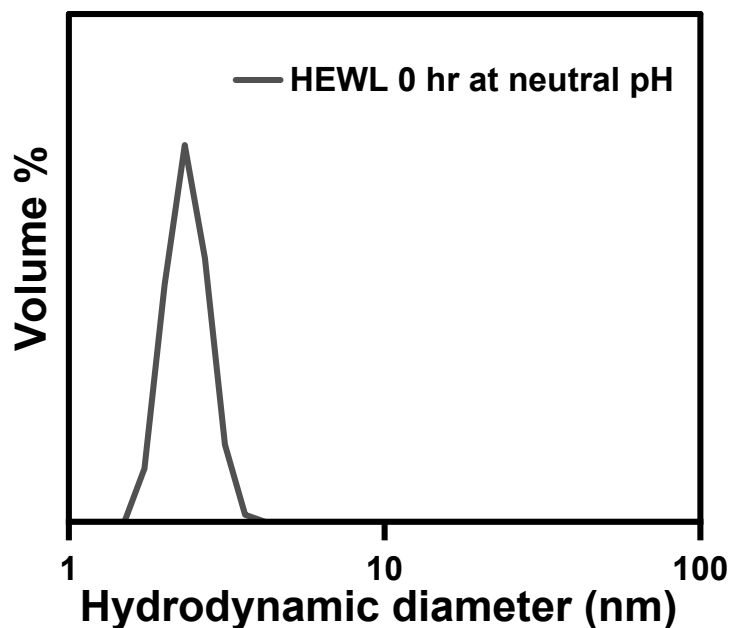

**Figure S4:** Measurement of hydrodynamic diameter of HEWL at neutral pH.

**References:**

1. X. Liu, M. Atwater, J. Wang and Q. Huo, *Colloids Surf B Biointerfaces*, 2007, 58, 3–7.
2. R. C. Mucic, J. J. Storhoff, C. A. Mirkin and R. L. Letsinger, *J. Am. Chem. Soc.*, 1998, 120, 12674–12675.
3. H. Zhang, I. Hussain, M. Brust and A. I. Cooper, *Advanced Materials*, 2004, 16, 27–30.
4. Y.-H. Liao, Y.-J. Chang, Y. Yoshiike, Y.-C. Chang and Y.-R. Chen, *Small*, 2012, 8, 3631–3639.
5. Z. Bednarikova, J. Marek, E. Demjen, S. Dutz, M.-M. Mocanu, J. W. Wu, S. S.-S. Wang and Z. Gazova, *Journal of Magnetism and Magnetic Materials*, 2019, 473, 1–6.
6. S. Li, L. Wang, C. C. Chusuei, V. M. Suarez, P. L. Blackwelder, M. Micic, J. Orbulescu and R. M. Leblanc, *Chem. Mater.*, 2015, 27, 1764–1771.
7. S. Palmal, N. R. Jana and N. R. Jana, *J. Phys. Chem. C*, 2014, 118, 21630–21638.
